# Supplementary material for: Impact of Acoustic and Interactive Disruptive Factors during Robot-Assisted Surgery—A Virtual Surgical Training Model
Source: PubMed Central journal article supplement (PMC7594064; doi:10.3390/s20205891), 2020-10-17
Supplement: sensors-20-05891-s001.pdf [file sensors-20-05891-s001.pdf]

# PROFESSIONAL AND PERSONAL QUALITIES OF PARTICIPANTS ON THE ROBOT SIMULATOR

Name: \_\_\_\_\_

No.: \_\_\_\_\_

Email: \_\_\_\_\_

Age: \_\_\_\_\_

Male: m / f / d

- Professional experience:
- a) Resident \_\_\_\_
  - b) Specialist \_\_\_\_
  - c) Consultant \_\_\_\_
  - d) Clinical director \_\_\_\_
  - e) Others: \_\_\_\_\_

Professional experience in years: \_\_\_\_\_

Experience in minimal invasive surgery in years: \_\_\_\_\_

How do you rate your expertise in laparoscopic surgery?

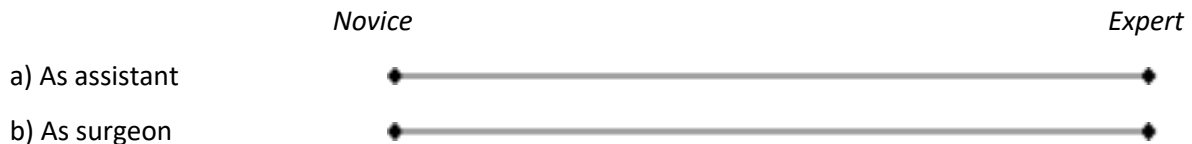

How many laparoscopic surgeries have you performed so far?

a) As assistant \_\_\_\_\_

b) As surgeon \_\_\_\_\_

How many laparoscopic operations do you perform per week?

a) As assistant \_\_\_\_\_

b) As surgeon \_\_\_\_\_

How do you rate your experience in the field of computer games?

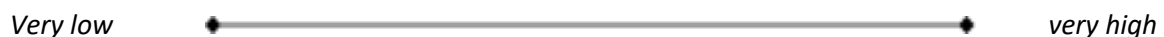

How do you rate your experience in practicing music?

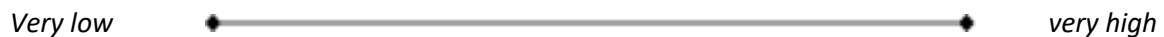

Handedness: a) right-handed

b) left-handed

c) ambidextrous

I consent to the anonymous processing of my data and training results.

\_\_\_\_\_

Signature

Thank you very much for your participation.

# TEILNAHME ROBUSTHEITSCHECK AM ROBOTERSIMULATOR

Name, Vorname: \_\_\_\_\_

Nr.: \_\_\_\_\_

Emailadresse: \_\_\_\_\_

Alter: \_\_\_\_\_

Geschlecht: m / w / d

Stellenbezeichnung: a) Assistenzärztin/arzt \_\_\_\_\_

b) Fachärztin/arzt \_\_\_\_\_

c) Oberärztin/arzt \_\_\_\_\_

d) Chefärztin/arzt \_\_\_\_\_

e) Sonstige: \_\_\_\_\_

Berufserfahrung in Jahren: \_\_\_\_\_

Erfahrung mit minimalinvasiver Chirurgie in Jahren: \_\_\_\_\_

Wie schätzen Sie Ihre Expertise in laparoskopischer Chirurgie ein? Bitte ankreuzen!

*Anfänger*

*Experte*

a) als Assistenz

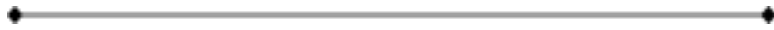

b) als Operateur

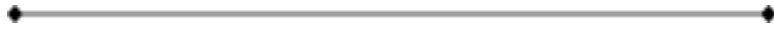

Wie viele laparoskopische Operationen haben Sie bisher in etwa durchgeführt

a) als Assistenz? \_\_\_\_\_

b) als Operateur? \_\_\_\_\_

Wie viele laparoskopische Operationen führen Sie pro Woche durch?

a) als Assistenz \_\_\_\_\_

b) als Operateur \_\_\_\_\_

Erfahrung im Bereich Computerspiele? Bitte ankreuzen!

*Keine*

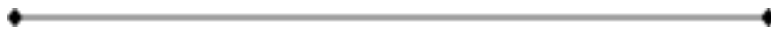

*sehr viel*

Erfahrung im Praktizieren von Musik? Bitte ankreuzen!

*Keine*

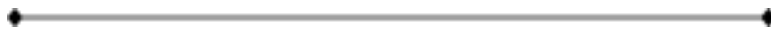

*sehr viel*

Händigkeit: a) rechtshändig

b) linkshändig

c) beidhändig

Ich bin mit der Weitergabe meiner Daten und Trainingsergebnisse in anonymisierter Form einverstanden.

\_\_\_\_\_  
Unterschrift

Herzlichen Dank für Ihre Teilnahme!
